# Supplementary material for: Antagonism of Rhizosphere Streptomyces yangpuensis CM253 against the Pathogenic Fungi Causing Corm Rot in Saffron (Crocus sativus L.)
Source: MDPI journal article supplement (doi:10.3390/pathogens11101195), 2022-10-16
Supplement: s1 [file s1]

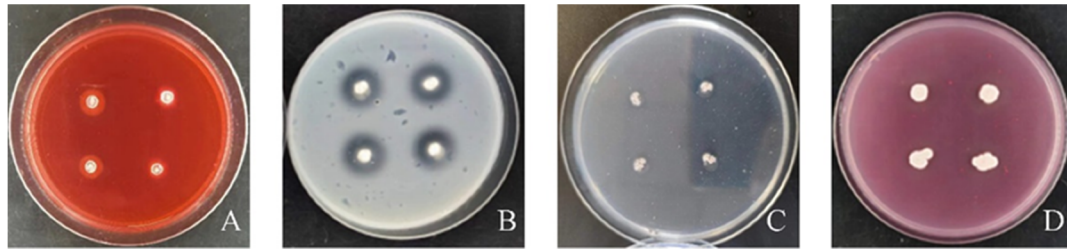

**Figure S1.** Hydrolytic enzymes' activities. A: cellulase +, B: protease +, C: chitinase -, and D: glucanase +.

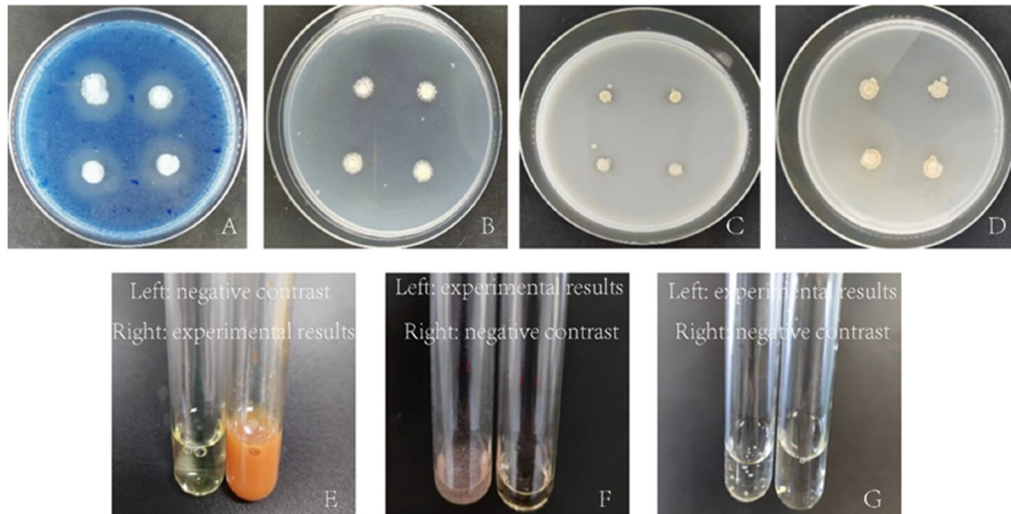

**Figure S2.** Plant-growth-promoting attributes. A: siderophore production +; B: potassium dissolution-; C: inorganic phosphate solubilization -; D: organic phosphate solubilization -; E:  $\text{NH}_3$  production +; F: ACC deaminase enzyme +; and G: IAA production +.
